# Supplementary material for: Androgen receptor‐mediated transcriptional repression targets cell plasticity in prostate cancer
Source: PubMed Central journal article supplement (PMC9462842; doi:10.1002/1878-0261.13164), 2022-02-02

**A**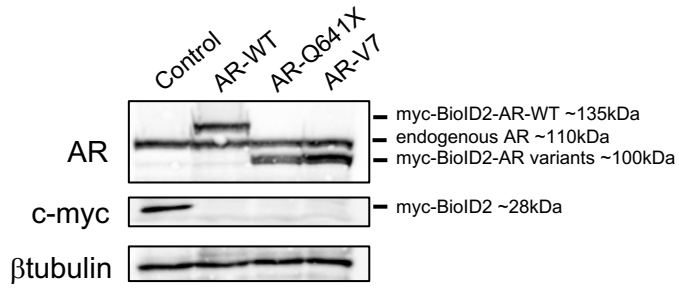**B**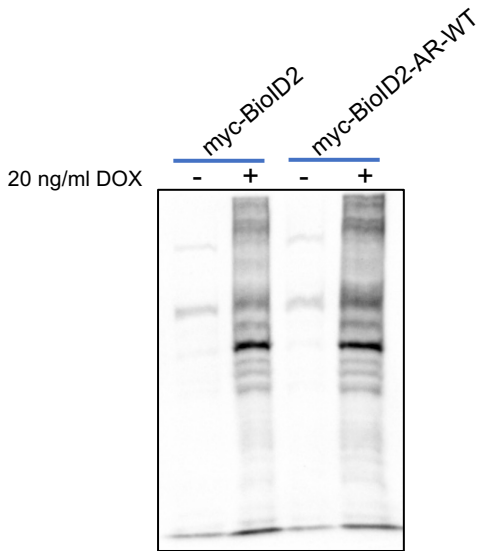**C**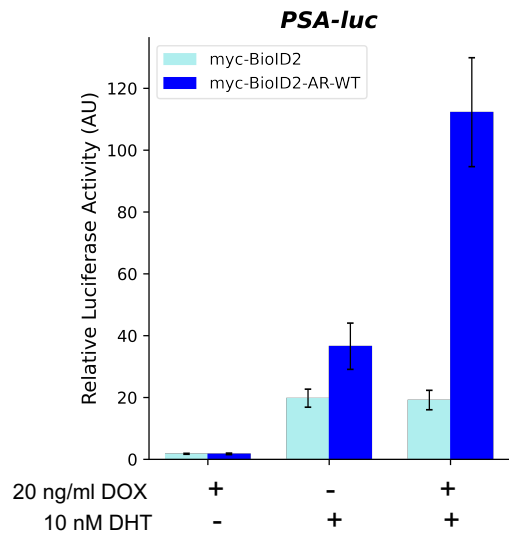

Supplement: MOL2-16-2518-s003.pdf [file MOL2-16-2518-s003.pdf]
