# Supplementary material for: Androgen receptor‐mediated transcriptional repression targets cell plasticity in prostate cancer
Source: PubMed Central journal article supplement (PMC9462842; doi:10.1002/1878-0261.13164), 2022-02-02

A

| Gene name        | Uniprot | 24h    |          | 48h    |          |
|------------------|---------|--------|----------|--------|----------|
|                  |         | log2FC | p-value  | log2FC | p-value  |
| <i>TUBB4A</i>    | P04350  | 0.74   | 2.34E-03 | -1.59  | 1.25E-04 |
| <i>UGT2B15</i>   | P54855  | -1.28  | 2.73E-05 | -1.02  | 2.57E-05 |
| <i>MAP1A</i>     | P78559  | -0.73  | 1.82E-04 | -0.97  | 1.19E-04 |
| <i>NIPSNAP3A</i> | Q9UFN0  | 0.42   | 2.90E-03 | -0.93  | 8.09E-05 |
| <i>TMEM38B</i>   | Q9NVV0  | -0.20  | 7.67E-01 | -0.91  | 4.67E-03 |
| <i>MYLK</i>      | Q15746  | 1.31   | 3.45E-04 | -0.74  | 1.11E-03 |
| <i>GCLC</i>      | P48506  | -0.23  | 9.93E-02 | -0.67  | 5.57E-03 |
| <i>UGT2B17</i>   | O75795  | -0.46  | 1.70E-05 | -0.45  | 1.39E-04 |
| <i>SELENBP1</i>  | Q13228  | -0.21  | 1.26E-02 | -0.41  | 4.20E-05 |
| <i>ATP2B1</i>    | P20020  | -0.14  | 2.05E-01 | -0.39  | 5.50E-04 |
| <i>SLC44A1</i>   | Q8WWI5  | -0.51  | 9.30E-04 | -0.33  | 1.27E-02 |
| <i>HACL1</i>     | Q9UJ83  | 0.01   | 8.58E-01 | -0.16  | 3.00E-02 |
| <i>HMGCS2</i>    | P54868  | -0.84  | 2.59E-03 | -0.04  | 8.66E-01 |
| <i>PMS2</i>      | P54278  | 0.40   | 3.17E-01 | 0.10   | 2.83E-01 |

B

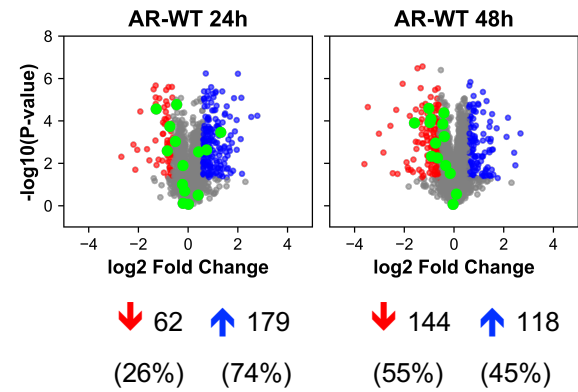

Supplement: MOL2-16-2518-s008.pdf [file MOL2-16-2518-s008.pdf]
